# Supplementary material for: iPSC-derived β cells model diabetes due to glucokinase deficiency
Source: JCI journal article supplement (doi:10.1172/jci67638), 2013-06-16
Supplement: sd1 [file 1]

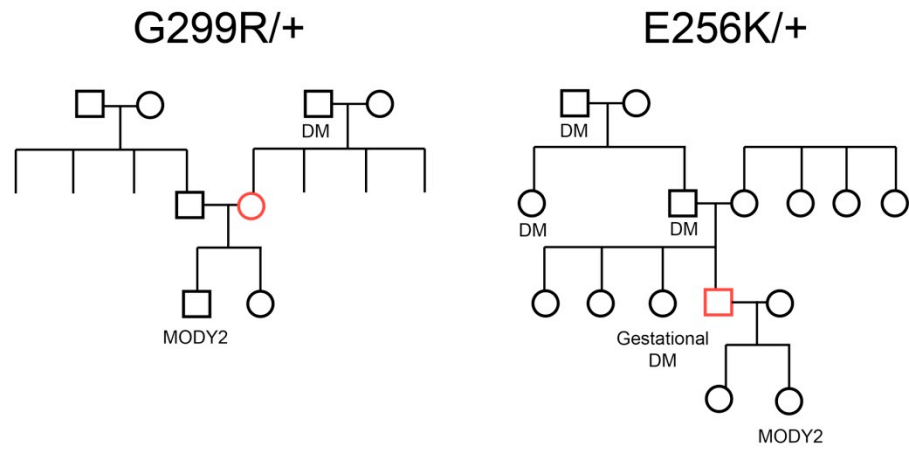

**Supplementary Figure 1** Pedigrees of the two MODY2 subjects that were studied (marked in red). DM, diabetes mellitus; MODY, maturity onset diabetes of the young.

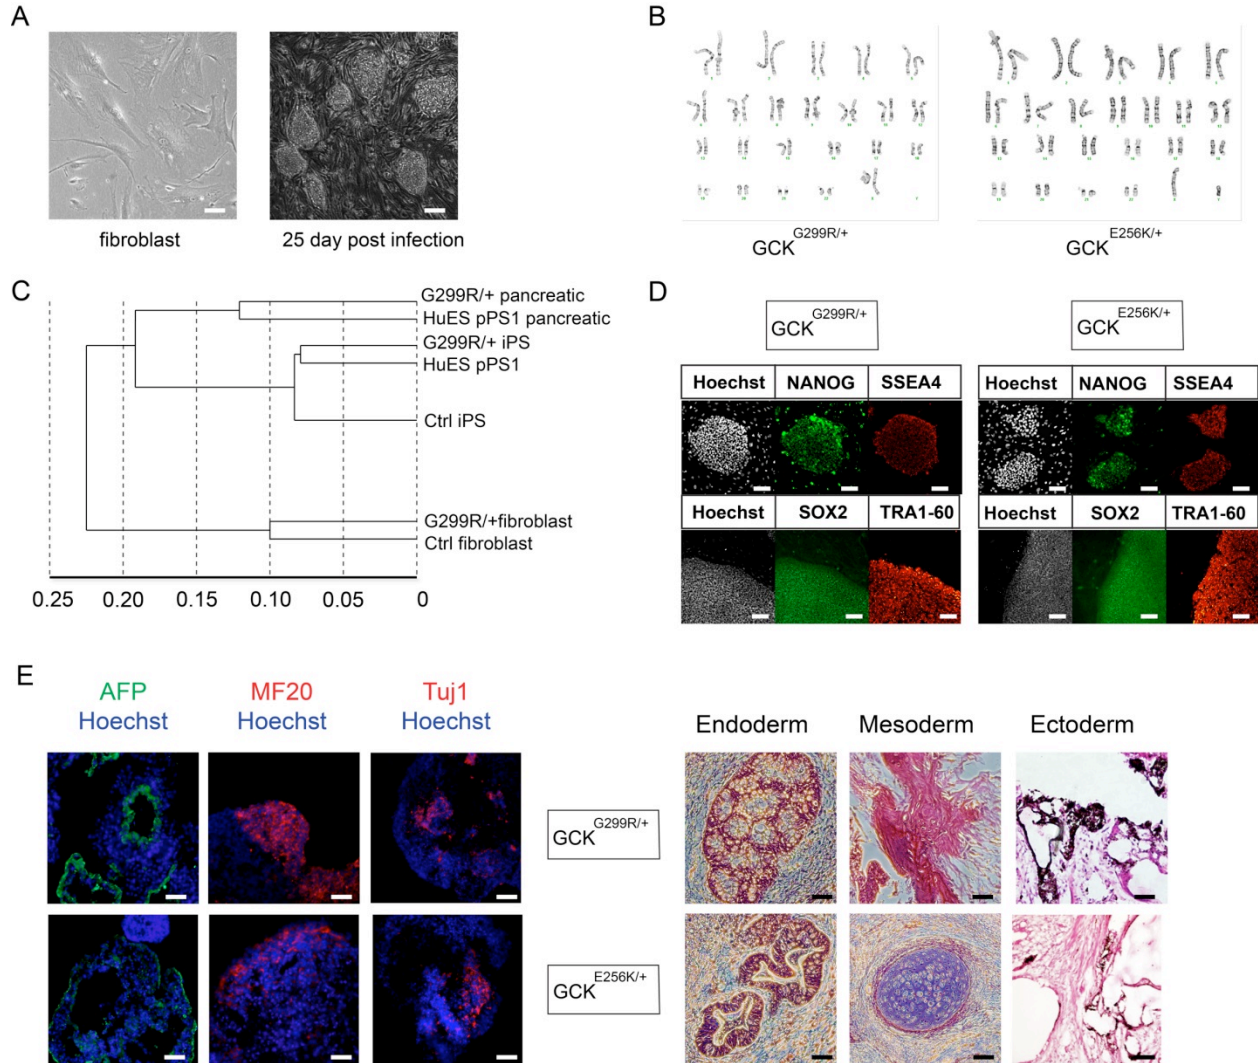

**Supplementary Figure 2** *GCK* mutant iPS cells are pluripotent. (A) Fibroblast cell line (scale bar, 10 $\mu$ m) and induced pluripotent cells (scale bar, 100 $\mu$ m) were derived from a MODY2 subject carrying a hypomorphic mutation (G299R) in the glucokinase gene (*GCK*). (B) iPS cells from the two MODY2 subjects had normal karyotypes. (C) A cluster tree showing global gene expression profiles of iPS cells and fibroblast cells of control and MODY2 subjects and pancreatic cells differentiated from MODY2 iPS and human ES cells (pPS1, (Noggle et al., 2011)). (D) Pluripotency marker genes expressed in the stem cells generated from two MODY2 subjects. Scale bar, 50  $\mu$ m. (E) Embryoid bodies formed by *GCK* mutant stem cells contained three germ layers- endoderm (AFP+), mesoderm (MF20+) and ectoderm (Tuj1+) (left panel). *GCK* mutant stem cells formed teratomas that contained tissue structures from three germ layers (right panel). Scale bar, 200  $\mu$ m.

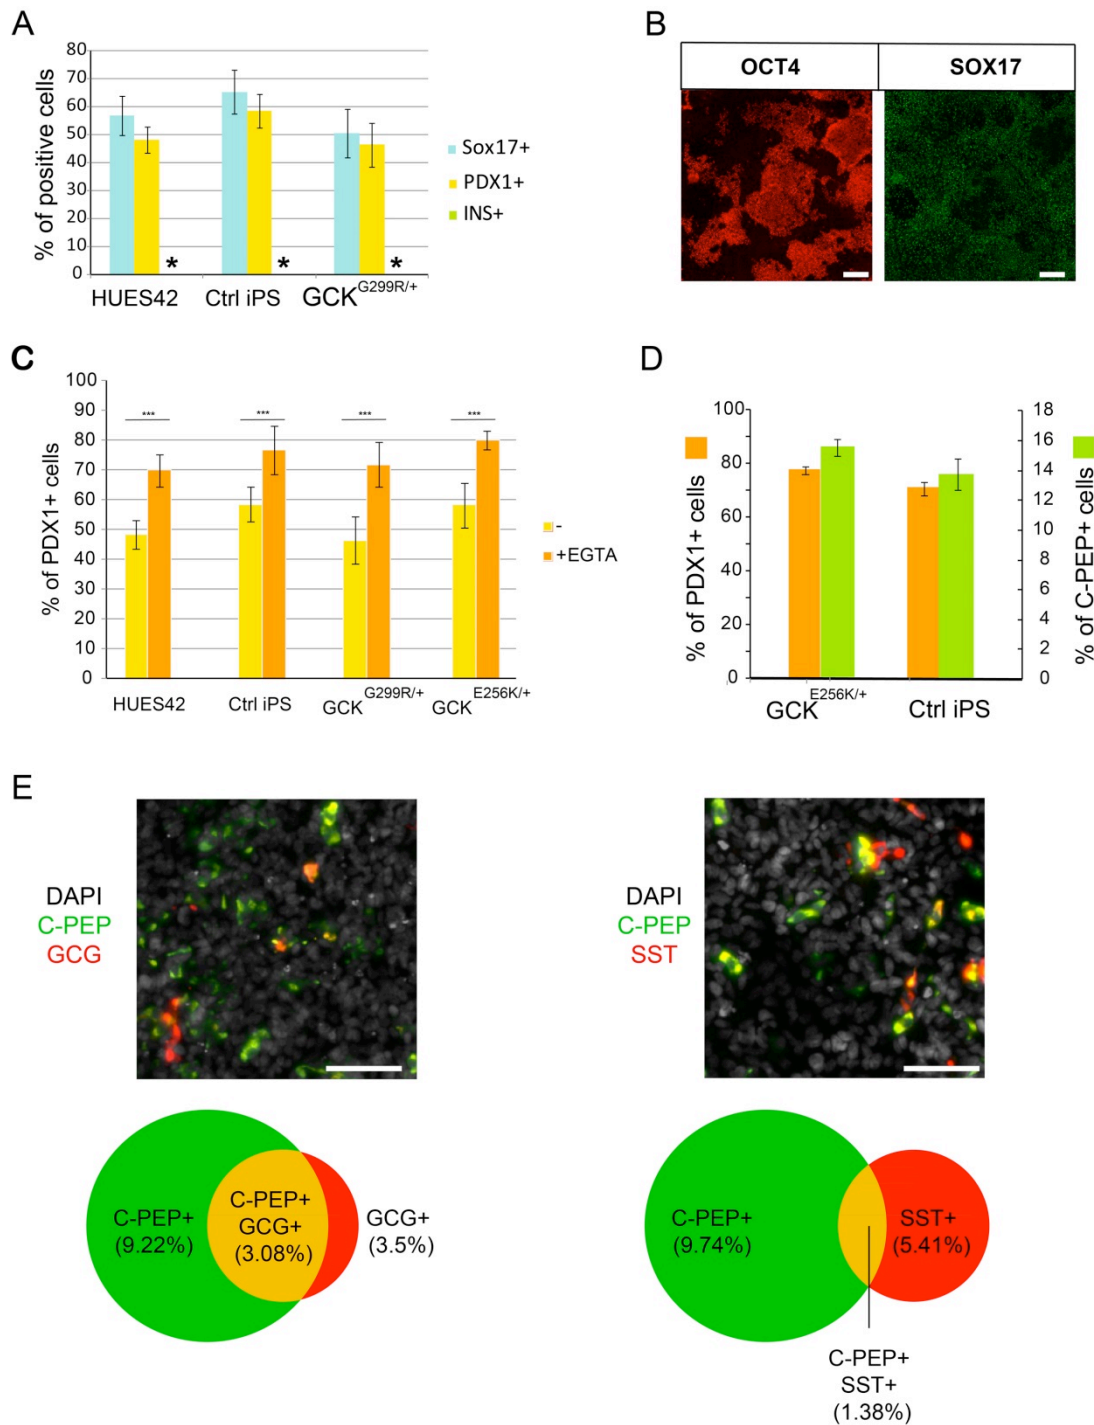

**Supplementary Figure 3** Differentiation of stem cells into beta cells *in vitro*. (A) Efficiency of generating pancreatic progenitors and insulin-producing cells using a published protocol (D'Amour et al., 2006). \* indicates no insulin positive cells. (B) Distribution of SOX17<sup>+</sup> and OCT4<sup>+</sup> cells after 3 days of differentiation following the published protocol. Scale bar, 50  $\mu$ m. (C) Quantification of pancreatic progenitor cells (PDX1<sup>+</sup>) after 8 days of differentiation. \*\*\*:  $P < 0.001$ . (D) Differentiation efficiency of GCK<sup>E256K/+</sup> and control cells. (E) Expression of endocrine hormones after 12 days of differentiation and diagrams showing proportion of insulin and glucagon (left) or insulin and somatostatin (right)-producing cells. Scale bar, 100  $\mu$ m. C-PEP: C-peptide, GCG: glucagon, SST: somatostatin.

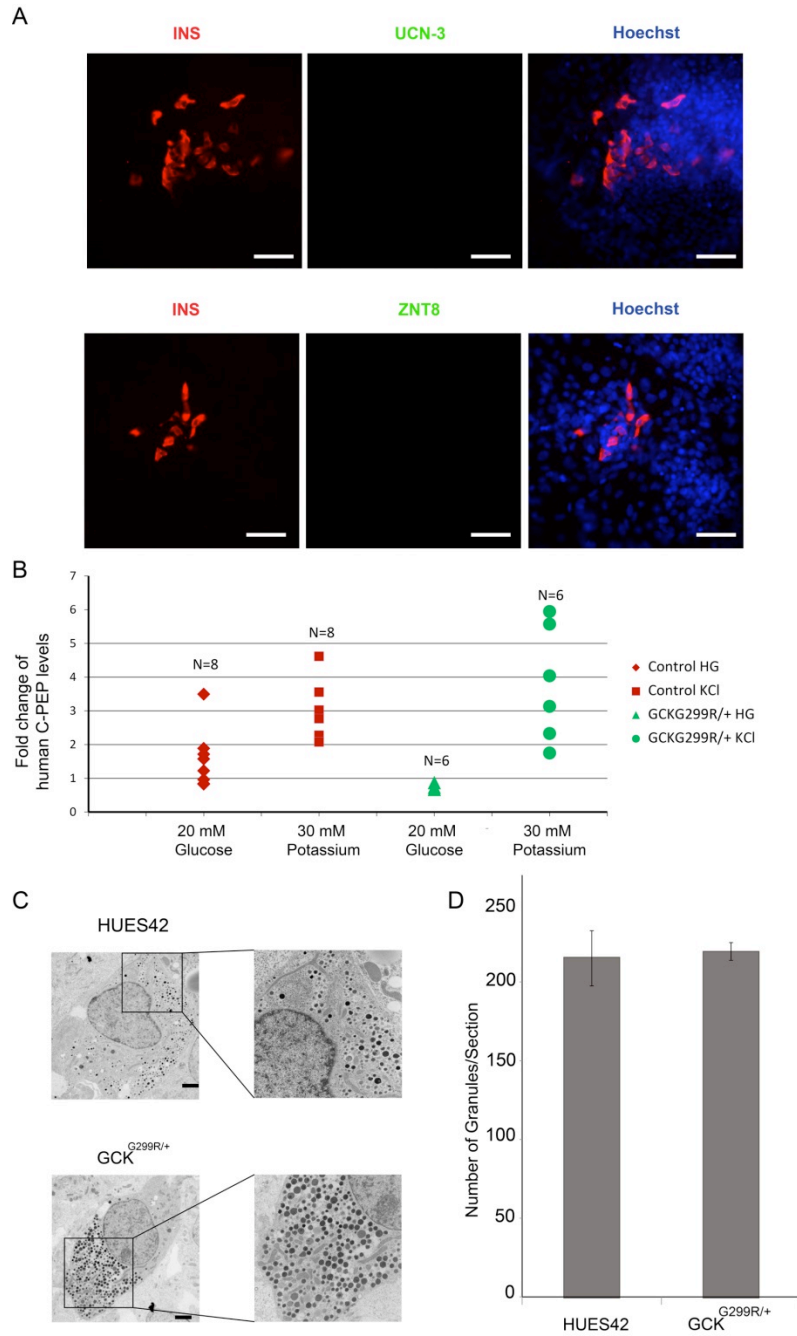

**Supplementary Figure 4** Beta cells derived *in vitro* were not fully mature yet displayed insulin secretion defect specific to glucose. (A) Immunostaining of *in vitro* differentiated beta cells. INS: insulin, UCN-3: urocotin-3, ZNT8: zinc transporter 8. Scale bar, 100  $\mu$ m. (B) Insulin (C-peptide) secretion of *in vitro* derived beta cells in response to glucose (20mM) and potassium (30 mM). The basal condition was 2.5 mM glucose and 4.8 mM potassium. 5 out of 8 control replicas showed response to glucose while none of the *GCK* mutant replicas did. All the control and *GCK* mutant replicas showed response to potassium. (C) Electron microscope (EM) images of insulin producing cells derived from ES cells and *GCK*<sup>G299R/+</sup> cells. Scale bar, 2  $\mu$ m (D) Quantification by EM of insulin granule numbers per insulin-producing cell, by genotype. (n=3 per genotype).

**Supplementary Table 1** Summary of clinical characteristics of the 2 MODY2 subjects.

| Genetic Diagnosis       | Age at Clinical Diagnosis | Anti-GAD Antibodies | BMI | Race      | Family history of diabetes | Controlled with oral agents |
|-------------------------|---------------------------|---------------------|-----|-----------|----------------------------|-----------------------------|
| GCK mutation gly229>arg | 21                        | Neg                 | 21  | Caucasian | 3 generations              | yes                         |
| GCK mutation glu256>lys | 47                        | Neg                 | 26  | Caucasian | 2 generations              | yes                         |

**Supplementary Table 2** Primer sequences.

| primer                 | sequences                        |
|------------------------|----------------------------------|
| GCK-5arm-forward       | ccgctcgagcgggtgcatcttccagct      |
| GCK-5arm-reverse       | cccaagcttgggcaccttccctgcct       |
| GCK-3arm-forward       | ccgctcgagcgggctggaatcaattccaga   |
| GCK-3arm-reverse       | cggaaattccgcgtgatgctgttccagagaa  |
| GCK-correction-forward | ccgctcgagcgggtcccaagacacttccacat |
| GCK-correction-reverse | ggactagtccataggcgttccactgacagg   |
| P1                     | gcatcttccagctcttcgac             |
| P2                     | ctaaagcgcgatgctccagac            |
| P3                     | aggccctagtttcccatcc              |
| Southern Probe forward | tccagatgctcctgtcagtg             |
| Southern Probe reverse | gagccaaagcaattccacat             |
| INS RTPCR forward      | ttctacacaccaagaccg               |
| INS RTPCR reverse      | caatgccacgcttctgc                |
| GCK RTPCR forward      | ctgaacctcaaaccctaac              |
| GCK RTPCR reverse      | tgccaggatctgcttacct              |
| GLUT2 RTPCR forward    | catgtgccacactcacacia             |
| GLUT2 RTPCR reverse    | atccaaactggaaggaccc              |

**Supplementary Table 3** Beta-cell differentiation medium compositions.

| Stage                           | Day  | Basic Medium | Supplement                                                                                            |
|---------------------------------|------|--------------|-------------------------------------------------------------------------------------------------------|
| Stage 1:<br>Definitive Endoderm | 1    | RPMI         | Activin A (100 ng/ml)<br>Wnt3A (25 ng/ml)<br>75 uM EGTA                                               |
|                                 | 2-3  | RPMI         | Activin A (100 ng/ml), 0.2% FBS                                                                       |
| Stage 2:<br>Primitive Gut Tube  | 4-5  | RPMI         | FGF10 (50 ng/ml),<br>KAAD-cyclopamine (0.25 uM)<br>2% FBS                                             |
| Stage 3:<br>Posterior Foregut   | 6-8  | DMEM         | FGF10 (50 ng/ml),<br>KAAD-cyclopamine (0.25 uM)<br>Retinoic acid (2 uM)<br>LDN-193189 (250 nM)<br>B27 |
| Stage 4:<br>Pancreatic Endoderm | 9-12 | CMRL         | Exendin-4 (50 ng/ml)<br>SB431542 (2uM)<br>B27                                                         |
| Stage 5: Endocrine              | 13+  | CMRL         | B27                                                                                                   |

**References:**

- D'Amour, K.A., Bang, A.G., Eliazer, S., Kelly, O.G., Agulnick, A.D., Smart, N.G., Moorman, M.A., Kroon, E., Carpenter, M.K., and Baetge, E.E. (2006). Production of pancreatic hormone-expressing endocrine cells from human embryonic stem cells. *Nat Biotechnol* 24, 1392-1401.
- Noggle, S., Fung, H.L., Gore, A., Martinez, H., Satriani, K.C., Prosser, R., Oum, K., Paull, D., Druckenmiller, S., Freeby, M., *et al.* (2011). Human oocytes reprogram somatic cells to a pluripotent state. *Nature* 478, 70-75.
